# Supplementary material for: ZnIn2S4 combined with a flower-like NiAl-layered double hydroxide with enhanced photocatalytic H2 production activity
Source: Royal Society of Chemistry journal article supplement (doi:10.1039/d5dt01018g), 2025-01-01
Supplement: d5dt01018g1.pdf [file d5dt01018g1.pdf]

## Supporting information

### ZnIn<sub>2</sub>S<sub>4</sub> Combined with a Flower-like NiAl-layered Double Hydroxide with Enhanced Photocatalytic H<sub>2</sub> Production Activity

Anna P. Souri<sup>1,2</sup>, Onur Cavdar<sup>2</sup>, Maria Zografaki<sup>1,3</sup>, Leila Zouridi<sup>1,4</sup>, Vassilios Binas<sup>1,3</sup>, Tomasz Klimczuk<sup>5,6</sup>, Kostiantyn Nikiforow<sup>7</sup>, Anna Malankowska<sup>2\*</sup>

<sup>1</sup> Institute of Electronic Structure and Laser, Foundation for Research and Technology-Hellas, 71110 Heraklion,

<sup>2</sup> Department of Environmental Technology, Faculty of Chemistry, University of Gdansk, 80-308 Gdansk, Poland

<sup>3</sup> Department of Chemistry, Aristotle University of Thessaloniki, Thessaloniki, Greece

<sup>4</sup> Department of Materials Science and Technology, University of Crete, Heraklion, Greece

<sup>5</sup> Faculty of Applied Physics and Mathematics, Gdansk University of Technology, Narutowicza, Gdansk, Poland

<sup>6</sup> Advanced Materials Center, Gdansk University of Technology, Narutowicza, Gdansk, Poland

<sup>7</sup> Mazovia Center for Surface Analysis, Institute of Physical Chemistry, Polish Academy of Sciences, 01-224, Warsaw, Poland

\*[anna.malankowska@ug.edu.pl](mailto:anna.malankowska@ug.edu.pl)

**Table S1:** Reports of ZIS/LDHs pairing from literature

| Reference | Composite            | Application                                                                       | H <sub>2</sub> rate (mmol g <sup>-1</sup> h <sup>-1</sup> ) | Irradiation        | AQE (%) | λ (nm) |
|-----------|----------------------|-----------------------------------------------------------------------------------|-------------------------------------------------------------|--------------------|---------|--------|
| Our work  | ZIS/NiAl/Pt          | H <sub>2</sub> evolution                                                          | 1.6<br>0.3                                                  | UV-vis<br>visible  | 1.7     | 320    |
| [2]       | ZIS/NiAl/carbon q.d. | H <sub>2</sub> evolution                                                          | 23.1                                                        | visible            | 3.6     | 420    |
| [3]       | ZIS/NiFe             | H <sub>2</sub> evolution                                                          | 2.0                                                         | visible            | 7.2     | 420    |
| [4]       | ZIS/MgAl             | Cr(VI) reduction and H <sub>2</sub> evolution                                     | 1.9                                                         | visible            | 35.7    | 380    |
| [5]       | ZIS/CoAl             | H <sub>2</sub> evolution                                                          | 1.5                                                         | simulated sunlight | 1.5     | 420    |
| [6]       | NiCo/ZIS             | Cr(VI) reduction                                                                  |                                                             | visible            |         |        |
| [7]       | ZIS/CoAl             | H <sub>2</sub> evolution                                                          | 1.2                                                         | visible            | 0.6     | 450    |
| [8]       | NiCoFe/ZIS           | H <sub>2</sub> evolution coupled with benzylamine oxidation                       | 113.5                                                       | visible            | 14.3    | 420    |
| [9]       | CoNi/ZIS             | tetracycline degradation under photocatalytic-peroxymonosulfate activation system |                                                             |                    |         |        |

### Calculations for Pt photodeposition

In the case of ZIS/NiAl<sub>2</sub>S<sub>3</sub>/2.6Pt, 273  $\mu$ L of H<sub>2</sub>PtCl<sub>6</sub>·6H<sub>2</sub>O solution (50 mM) were dissolved in an aqueous solution (10 mL) containing 20% (v/v) methanol under vigorous stirring. The amount of H<sub>2</sub>PtCl<sub>6</sub>·6H<sub>2</sub>O solution was determined by taking into consideration the percentage of Pt in the metal salt (37%) and the formula:

$$V = \frac{m}{MW \cdot C} \quad (1)$$

where:

**m** is the amount of salt that corresponds to 2.6 wt% Pt,

**MW** is the molecular weight of the metal salt (517.72 gr mol<sup>-1</sup>),

**C** is the concentration of the metal solution (50 mM).

### Action spectra analysis for photocatalytic hydrogen evolution reaction

The quantum efficiency was calculated using the following equation (**Eq. 1**)

$$AQE (\%) = \frac{2 \times \text{Number of the hydrogen molecules}}{\text{Number of the incident photons}} \quad (\text{Eq. 1})$$

The derivation of the AQE formula was clearly given by Kalisman et al. [1].

Specifically, the AQE was calculated using the following formula:

$$AQE (\%) = \frac{2 \times N_{H_2} \times F \times 100}{P \times t \times A \times \lambda / (h \times c)} \quad (\text{Eq. 2})$$

**N<sub>H2</sub>**: number of moles of H<sub>2</sub> evolved (mol)

**F**: Avogadro's number

**P**: is the power density of the incident light

**t**: irradiation time

**A**: is the effective illuminated area

**$\lambda$** : wavelength of monochromatic light

**h**: Planck's constant

**c**: speed of light

The key parameters used:

- Speed of light (c):  $3 \times 10^8$  m/s
- Planck's constant (h):  $6.626 \times 10^{-34}$  J·s
- Avogadro's number:  $6.022 \times 10^{23}$  mol<sup>-1</sup>
- Sensor area: 0.709 cm<sup>2</sup>
- Irradiated area of the reactor: 3.0 cm<sup>2</sup>
- Wavelength ( $\lambda$ ): [provided per measurement see Fig.S1]

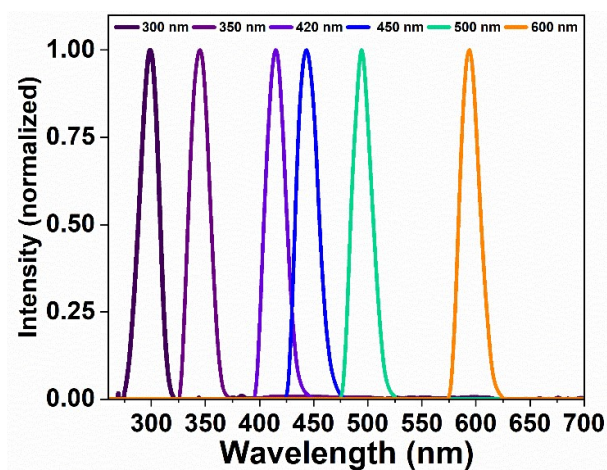

**Figure S1:** The emission spectra of each wavelength

(a)

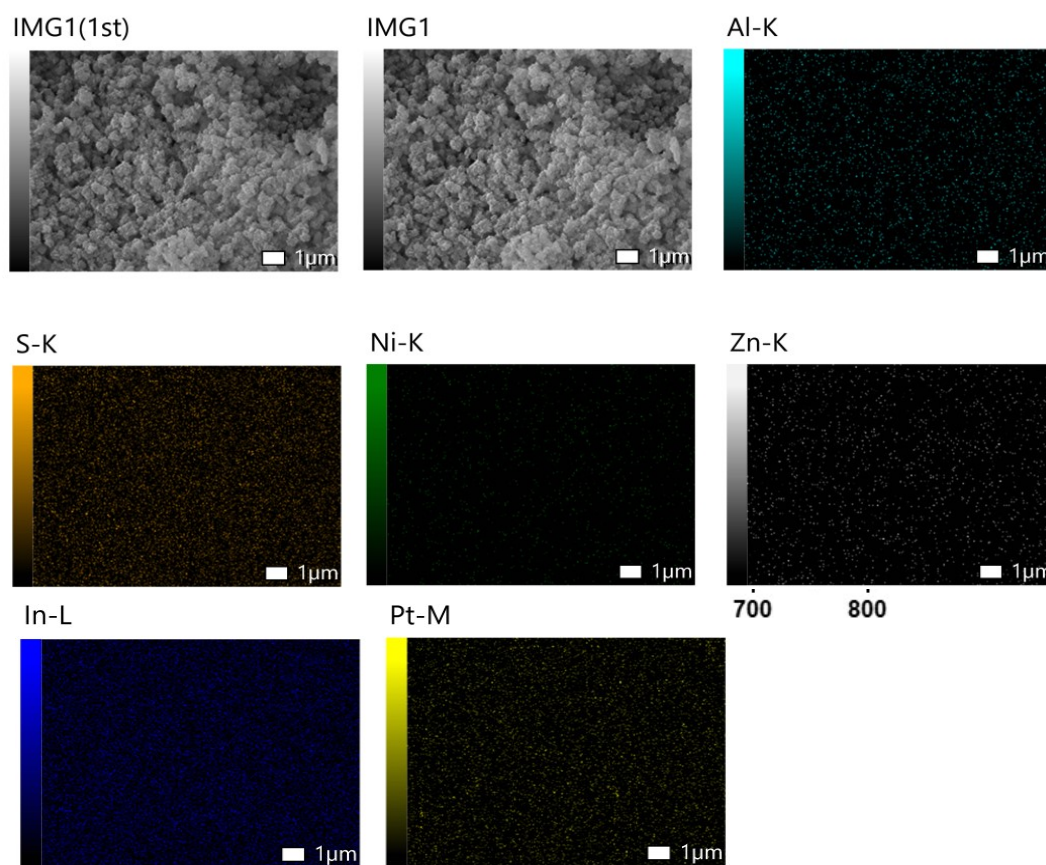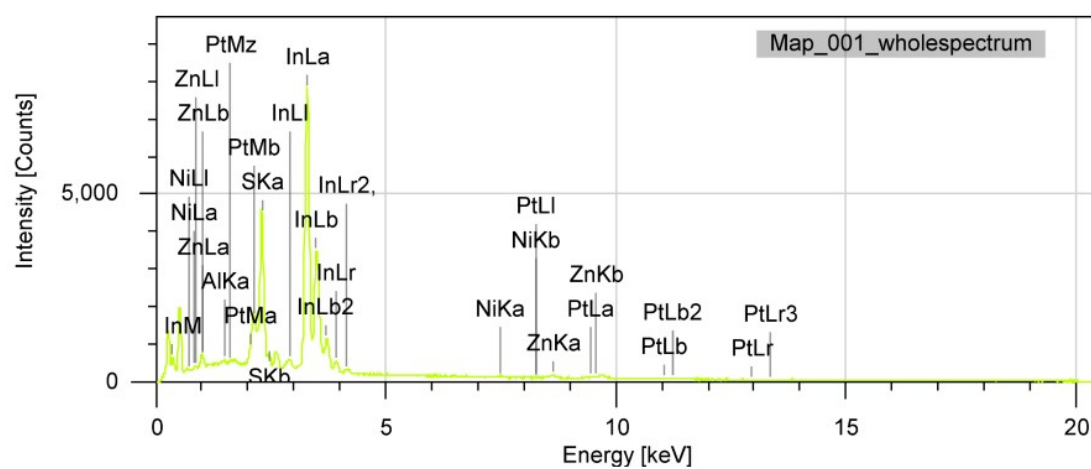

**Figure S2:** (a) Elemental mapping and (b) EDX spectrum of ZIS/NiAl2S5/1.95Pt sample

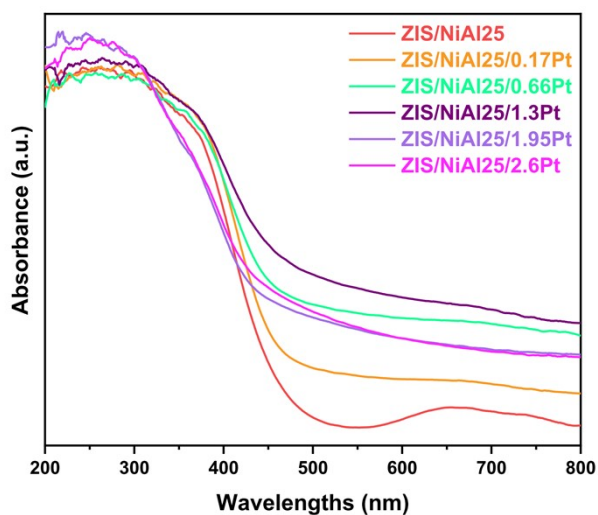

**Figure S3:** DRS spectra of ZIS/NiAl2S5 composite with different Pt loadings

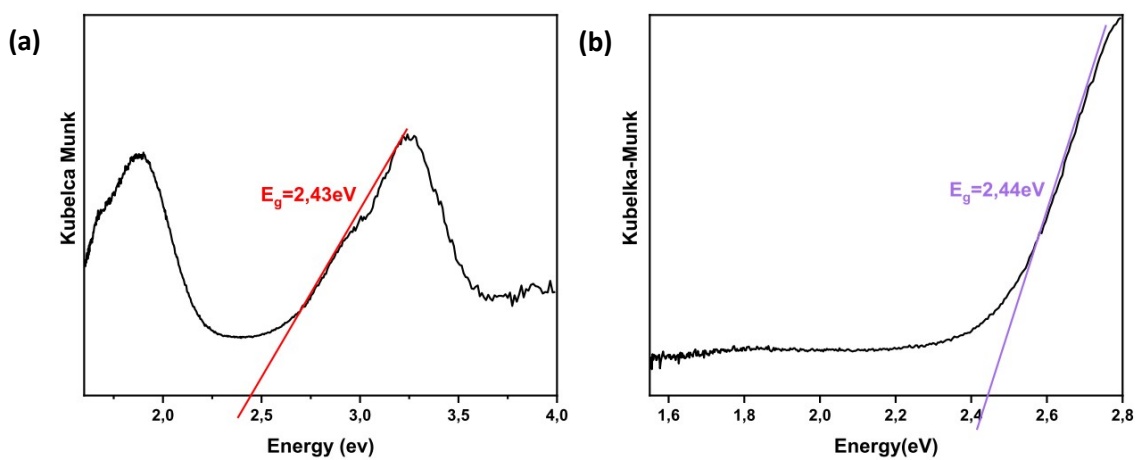

**Figure S4:** Tauc plots of pristine (a) NiAl and (b) ZIS and from which the  $E_g$  was extracted. The axes are  $(F(R) \cdot h\nu)^{1/n} - h\nu$ , where  $F(R)$  is the absorbance coefficient,  $h\nu$  is the photon energy ( $h$  is the Planck constant and  $\nu$  is the light frequency) and  $n$  was chosen 2 for ZIS and  $\frac{1}{2}$  for NiAl.

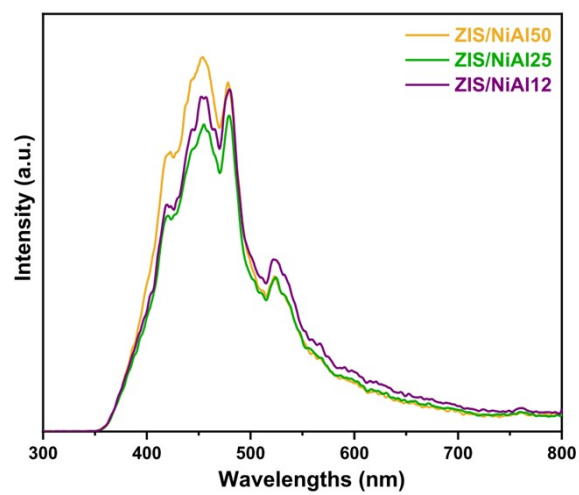

**Figure S5:** PL spectra of ZIS/NiAl<sub>x</sub> heterostructures where  $x=12.5$ ,  $25$  and  $50$

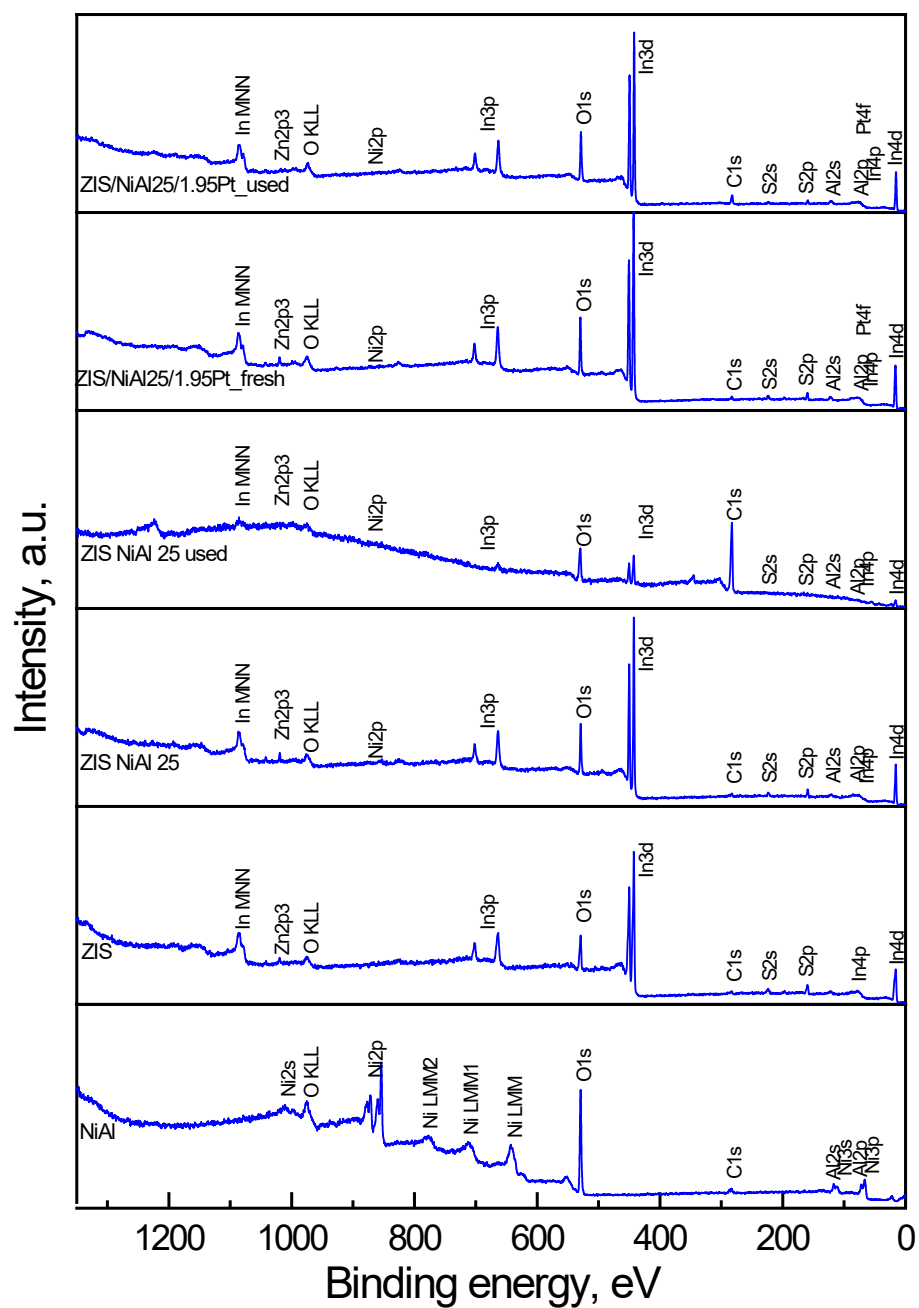

**Figure S6:** XPS spectra of prepared photocatalysts NiAl, ZIS, ZIS/NiAl25, ZIS/NiAl25/1.95Pt as well as ZIS/NiAl25 and ZIS/NiAl25/1.95Pt after photocatalytic reaction (marked as used)

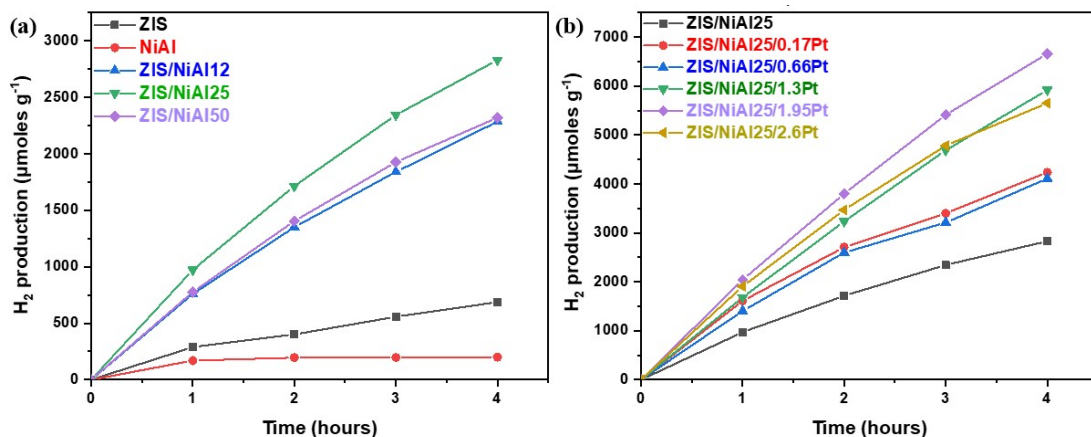

**Figure S7:** (a) Optimization of NiAl amount in ZIS/NiAl heterostructure and (b) optimization of Pt loading on ZIS/NiAl25 sample under UV-Vis irradiation. Reaction conditions: 25mg of catalyst, 20mL aqueous solution, 10% v/v of sacrificial agent (TEOA), Xe lamp 1000Watt

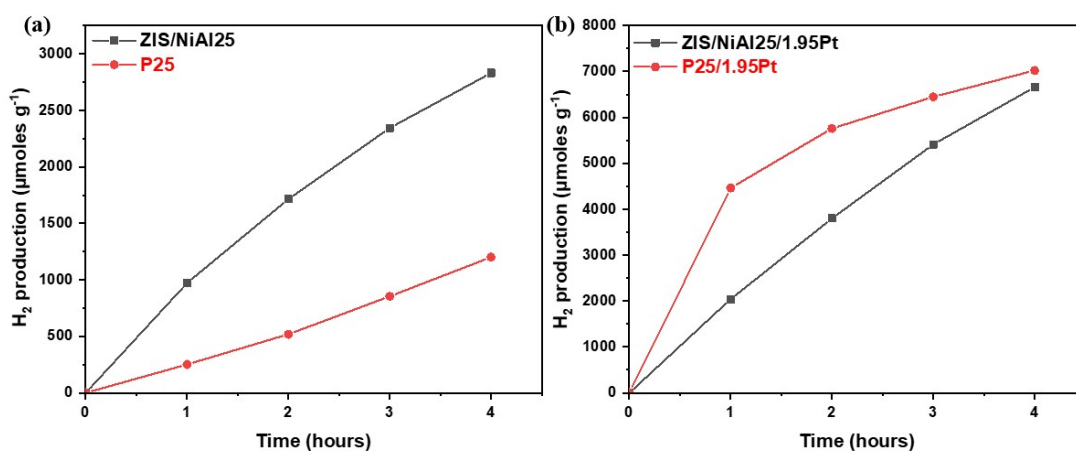

**Figure S8:** Comparison study (a) of sample with optimum NiAl amount (ZIS/NiAl 25) with P25 and (b) of sample with optimum Pt loading (1.95% wt) with P25 with the same Pt loading in UV-Vis irradiation. Reaction conditions: 25mg of catalyst, 20mL aqueous solution, 10% v/v of sacrificial agent (TEOA), Xe lamp 1000Watt



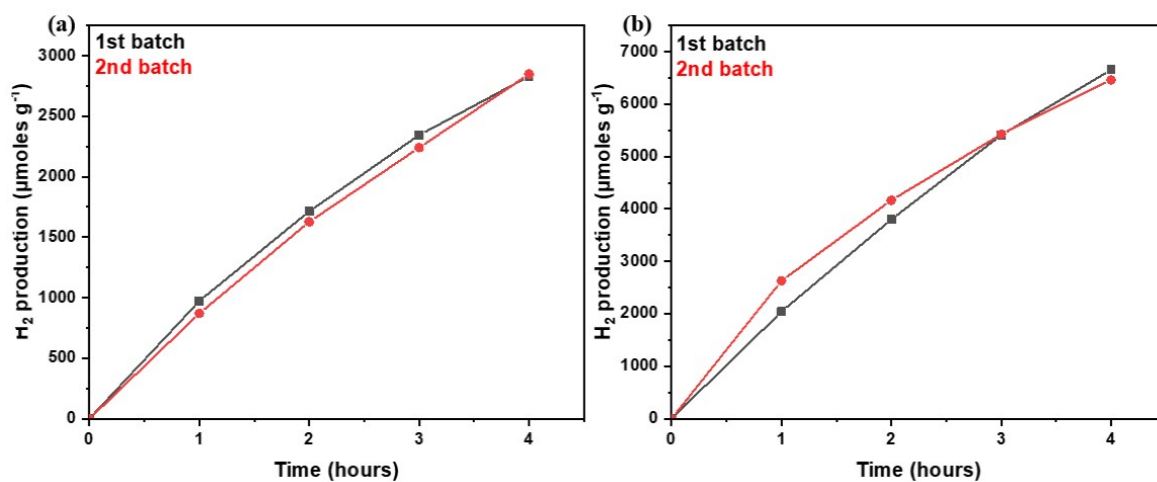

**Figure S9:** Photocatalytic H<sub>2</sub> rate of different batches of a) ZIS/NiAl<sub>25</sub> sample and b) ZIS/NiAl<sub>25</sub>/1.95Pt sample in UV-Vis. Reaction conditions: 25mg of catalyst, 20mL aqueous solution, 10% v/v of sacrificial agent (TEOA), Xe lamp 1000Watt

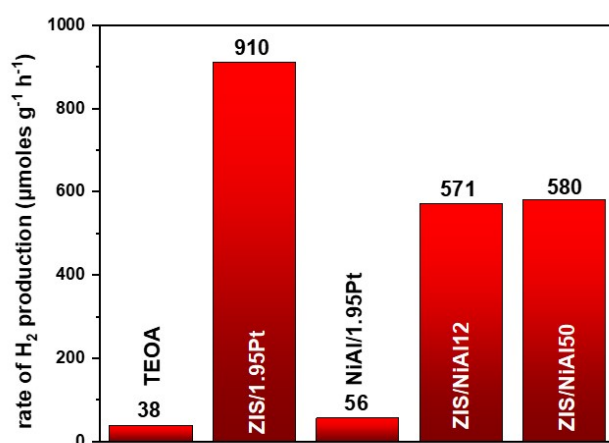

**Figure S10:** Photocatalytic H<sub>2</sub> rate of TEOA, ZIS/1.95Pt, NiAl/1.95Pt, ZIS/NiAl<sub>12</sub> and ZIS/NiAl<sub>50</sub> under UV-Vis. Reaction conditions: 25 mg of catalyst, 20 mL aqueous solution, 10% v/v of sacrificial agent (TEOA), Xe lamp 1000Watt

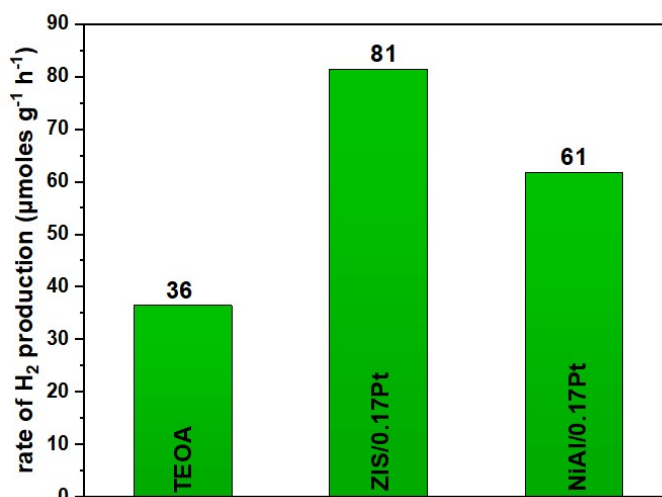

**Figure S11:** Photocatalytic H<sub>2</sub> rate of TEOA, ZIS/0.17Pt, NiAl/0.17Pt under visible irradiation ( $\lambda > 420$  nm). Reaction conditions: 25 mg of catalyst, 20 mL aqueous solution, 10% v/v of sacrificial agent (TEOA), Xe lamp 1000Watt

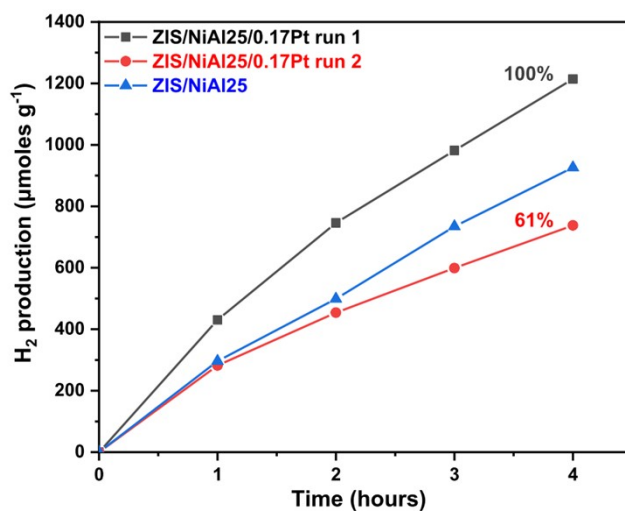

**Figure S12.** Cycling study of ZIS/NiAl/0.17Pt under visible irradiation ( $\lambda > 420$  nm). Reaction conditions: 25 mg of catalyst, 20 mL aqueous solution, 10% v/v of sacrificial agent (TEOA), Xe lamp 1000Watt

**Table S2:** The values of obtained AQE(%) in different wavelengths

| $\lambda$ (nm) | AQE (%) |
|----------------|---------|
| 320            | 1.70    |
| 350            | 1.40    |
| 420            | 0.30    |
| 450            | 0.10    |
| 500            | 0.02    |
| 600            | 0.03    |

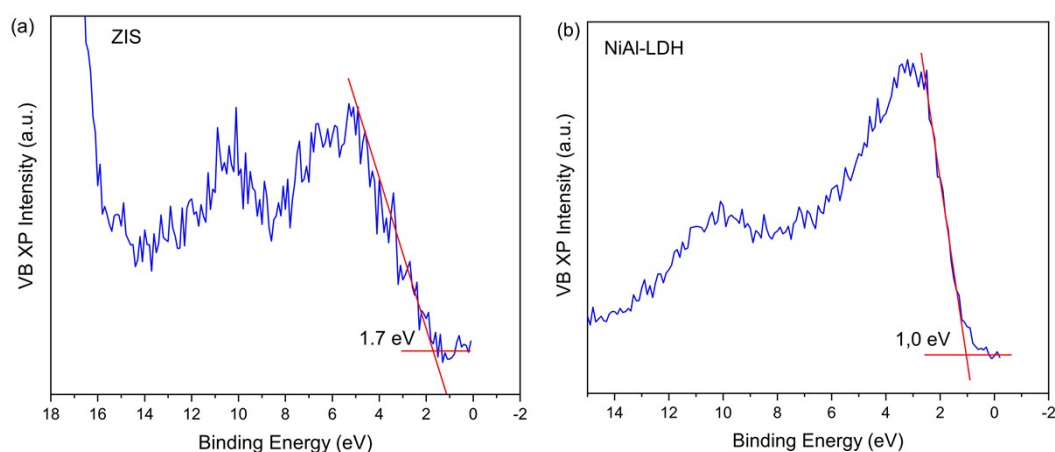

**Figure S13.** Valence band XP spectra of (a) ZIS and (b) NiAl-LDH samples.

## References:

- [1] P. Kalisman, Y. Nakibli, and L. Amirav, "Perfect Photon-to-Hydrogen Conversion Efficiency," *Nano Lett.*, vol. 16, no. 3, pp. 1776–1781, 2016, doi: 10.1021/acs.nanolett.5b04813.
- [2] X. Deng *et al.*, "Carbon-Dots-Modified Hierarchical ZnIn<sub>2</sub>S<sub>4</sub>/Ni-Al LDH Heterojunction with Boosted Charge Transfer for Visible-Light-Driven Photocatalytic H<sub>2</sub> Evolution," *Inorg. Chem.*, vol. 62, no. 24, pp. 9702–9712, 2023, doi: 10.1021/acs.inorgchem.3c01317.
- [3] S. Zhao *et al.*, "In Situ Growth of ZnIn<sub>2</sub>S<sub>4</sub> on MOF-Derived Ni-Fe LDH to Construct Ternary-Shelled Nanotubes for Efficient Photocatalytic Hydrogen Evolution," *Inorg. Chem.*, vol. 60, no. 13, pp. 9762–9772, 2021, doi: 10.1021/acs.inorgchem.1c01064.
- [4] Z. Yang, S. Li, X. Xia, and Y. Liu, "Hexagonal MgAl-LDH simultaneously facilitated active facet exposure and holes storage over ZnIn<sub>2</sub>S<sub>4</sub>/MgAl-LDH heterojunction for boosting photocatalytic activities and anti-photocorrosion," *Sep. Purif. Technol.*, vol. 300, no. July, p. 121819, 2022, doi: 10.1016/j.seppur.2022.121819.
- [5] Z. He, C. Qian, D. Chen, K. Xu, and W. Hao, "Design of ultrathin CoAl-LDHs/ ZnIn<sub>2</sub>S<sub>4</sub> with strong interfacial bonding and rich oxygen vacancies for highly efficient hydrogen evolution activity," *J. Colloid Interface Sci.*, vol. 651, no. July, pp. 138–148, 2023, doi: 10.1016/j.jcis.2023.07.179.
- [6] D. Wang, Z. Yang, Y. Xie, Y. Feng, and J. Yao, "NiCo Layered Double Hydroxide Bearing ZnIn<sub>2</sub>S<sub>4</sub> anosheets for Highly Efficient Photocatalytic Cr(VI) Reduction," *ACS Appl. Nano Mater.*, vol. 6, no. 7, pp. 6086–6091, 2023, doi: 10.1021/acsanm.3c00427.
- [7] L. Peng *et al.*, "Self-assembled transition metal chalcogenides@CoAl-LDH 2D/2D heterostructures with enhanced photoactivity for hydrogen evolution," *Inorg. Chem. Front.*, vol. 9, no. 5, pp. 994–1005, 2022, doi: 10.1039/d1qi01603b.
- [8] C. Tang *et al.*, "Bioinspired 3D penetrating structured micro-mesoporous NiCoFe-LDH@ ZnIn<sub>2</sub>S<sub>4</sub> Z-scheme heterojunction for simultaneously photocatalytic H<sub>2</sub> evolution coupled with benzylamine oxidation," *Appl. Catal. B Environ.*, vol. 342, no. September 2023, 2024, doi: 10.1016/j.apcatb.2023.123384.
- [9] Q. Zhou, B. Jiang, L. Zhang, Y. Sun, X. Yang, and L. Zhang, "1D/2D CoNi-LDH/ ZnIn<sub>2</sub>S<sub>4</sub> S-scheme heterojunction for effectively tetracycline degradation under photocatalytic-peroxymonosulfate activation system: DFT calculations and mechanism insights," *Chem. Eng. J.*, vol. 478, no. August, p. 147535, 2023, doi: 10.1016/j.cej.2023.147535.
